# Supplementary material for: In situ addition of graphitic carbon into a NiCo2O4/CoO composite: enhanced catalysis toward the oxygen evolution reaction
Source: Royal Society of Chemistry journal article supplement (doi:10.1039/c9ra05195c), 2019-01-01
Supplement: c9ra05195c1.pdf [file c9ra05195c1.pdf]

Electronic Supporting Information (ESI) for the following publication:

**In Situ addition of Graphitic Carbon into a NiCo<sub>2</sub>O<sub>4</sub>/CoO  
composite: its Enhanced Catalysis toward the Oxygen Evolution  
Reaction**

Srinivasa N, Shreenivasa L,<sup>1</sup> Prashanth S. A,<sup>2</sup> Jack P. Hughes,<sup>3,4</sup> Samuel J. Rowley-Neale,<sup>3,4</sup>  
Craig E Banks<sup>3,4\*</sup> and Ashoka S<sup>1\*</sup>

*<sup>1</sup>: Department of Chemistry, School of Engineering, Dayananda Sagar, University,  
Bangalore, India*

*<sup>2</sup>: PG Department of Chemistry, KLE's PC Jabin Science College, Hubballi, India*

*<sup>3</sup>: Faculty of Science and Engineering, Manchester Metropolitan University, Chester Street,  
Manchester M1 5GD, UK.*

*<sup>4</sup>: Manchester Fuel Cell Innovation Centre, Manchester Metropolitan University, Chester  
Street, Manchester M1 5GD, UK.*

\*To whom correspondence should be addressed.

Email: c.banks@mmu.ac.uk; S.Rowley-Neale@mmu.ac.uk; Tel: ++(0)1612471196; Fax: ++(0)1612476831

Website: [www.craigbanksresearch.com](http://www.craigbanksresearch.com)

**ESI Figure 1.** SEM images of the NiCo<sub>2</sub>O<sub>4</sub>/CoO/graphitic carbon composite prepared at 500 °C/3 minutes using (a, b) citric acid, (c, d) sucrose, (e, f) glycine.

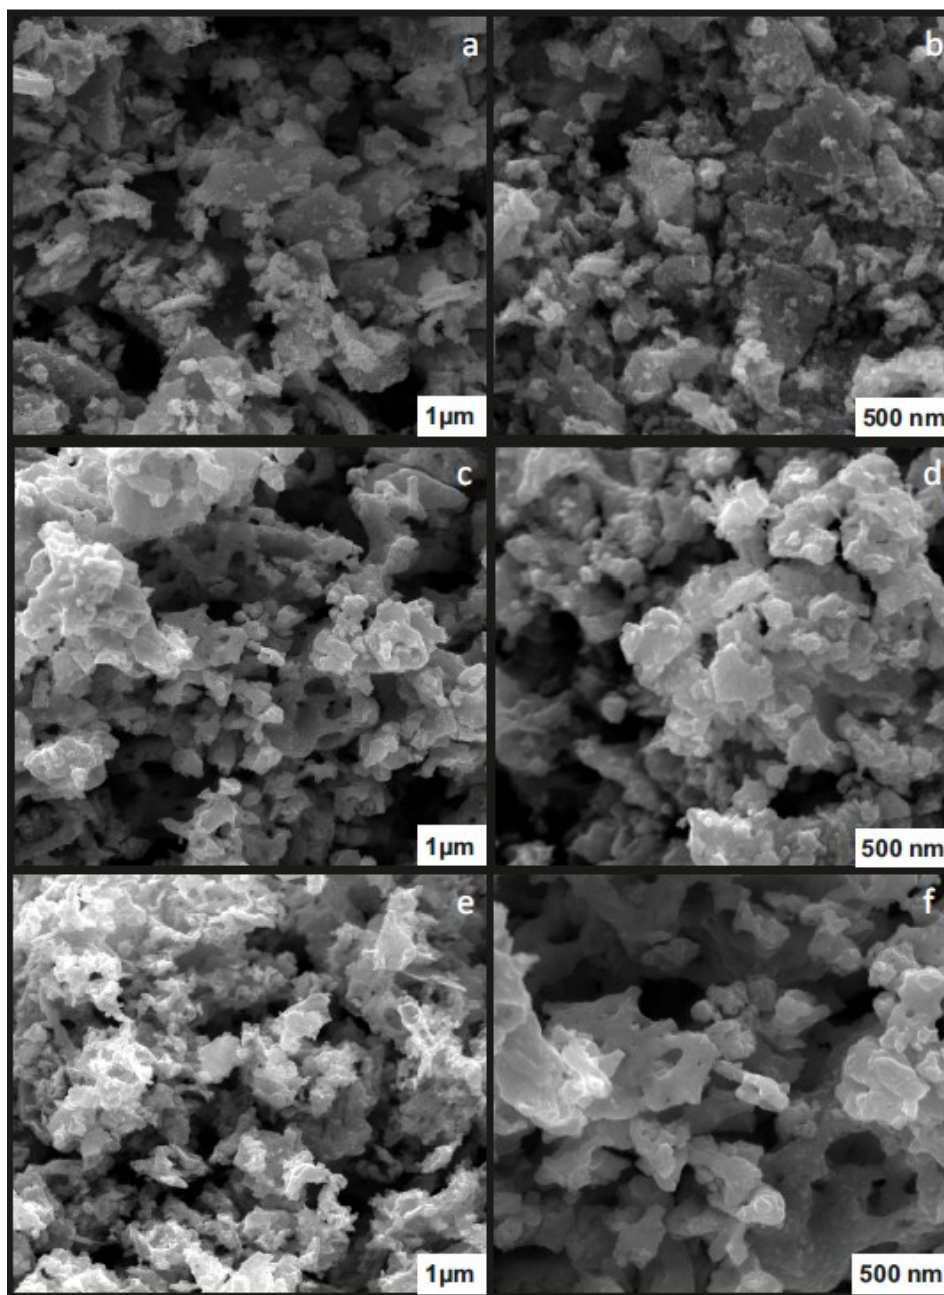

**ESI Figure 2.** Chronoamperometry stability curves of NiCo<sub>2</sub>O<sub>4</sub>/CoO/graphitic carbon composite derived from (a) citric acid, (b) sucrose and (c) glycine in applied potential of + 0.7 V in 1M KOH in the period of 10 hours.

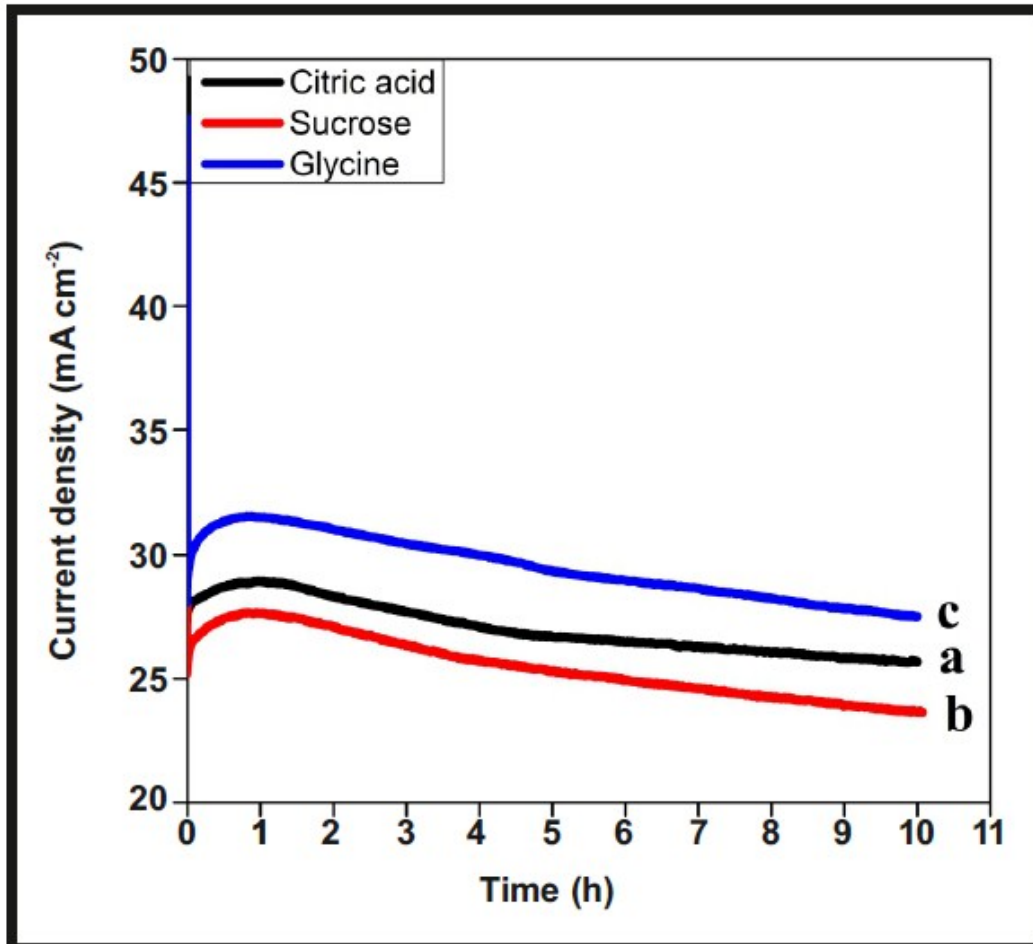

## Electrochemical calculations

### Conversion of the potential measured vs. Ag/AgCl to RHE electrode

The potential measured vs. the Ag/AgCl electrode, was converted to the reversible hydrogen electrode (RHE) scale according to the Nernst equation<sup>1-3</sup>

$$E_{\text{RHE}} = E_{\text{Ag/AgCl}} + 0.059 \cdot 14 + 0.196$$

The overpotential ( $\eta$ ) was calculated according to the following equation<sup>1-3</sup>

$$\eta \text{ (V)} = E_{\text{RHE}} - 1.23 \text{ V}$$

### Turn over frequency

Turn over frequency (TOF) was calculated according to the following equation:

$$\text{TOF} = jS/4Fn$$

where  $j$  is the measured current density at  $\eta_{10}$ ,  $S$  is the working electrode area ( $\text{cm}^2$ ),  $F$  is the Faraday constant, 4 is the number of electrons involved in the OER and  $n$  is the number of moles of the catalyst present in the working electrode.<sup>1,2</sup>

1. V. Maruthapandian, M. Mathankumar, V. Saraswathy, B. Subramanian and S. Muralidharan, *ACS Appl. Mater. Interfaces*, 2017, **9**, 13132-13141.
2. C. Chang, L. Zhang, C.-W. Hsu, X.-F. Chuah and S.-Y. Lu, *ACS Appl. Mater. Interfaces*, 2018, **10**, 417-426.
3. H. Shi and G. Zhao, *J. Phys. Chem. C*, 2014, **118**, 25939-25946.
